# Supplementary material for: Flavobacterium sp. strain GJW24 ameliorates drought resistance in Arabidopsis and Brassica
Source: Front Plant Sci. 2023 Oct 13;14:1257137. doi: 10.3389/fpls.2023.1257137 (PMC10613084; doi:10.3389/fpls.2023.1257137)
Supplement: Supplementary file 3 [file Table_3.xlsx]

## Sheet: Sheet1
Table S3 List of the GJW24-upregulated genes, assigned to the category for biological processes
Biological Process
GO Tern	Plant Organ Development (GO:0099402)	Root Development (GO:0048364)	Root System Development (GO:0022622)	Plant Organ Morphogenesis (GO:1905392)	Root Morphogenesis (GO:0010015)	Plant Epidermis Development (GO:0090558)	Toxin Metabolic Process (GO:0009404)	Response to Stress (GO:0006950)	Response to Stimulus (GO:0050896)	Defense Response (GO:0006952)	Secondary Metabolic Process (GO:0019748)	Response to Biotic Stimulus (GO:0009607)	Anatomical Structure Morphogenesis (GO:0009653)	Response to External Stimulus (GO:0009605)	System Development (GO:0048731)
	AT4G10500	AT4G29690	AT4G29690	AT5G47530	AT5G47530	AT4G12520	AT3G26830	AT5G12020	AT2G22810	AT4G10500	AT5G59530	AT4G10500	AT5G47530	AT4G10500	AT2G22810
	AT4G29690	AT5G47530	AT5G47530	AT5G49270	AT5G49270	AT5G46890	AT1G54000	AT4G10500	AT5G12020	AT5G59530	AT5G47530	AT5G59530	AT5G49270	AT5G59530	AT4G10500
	AT5G47530	AT5G46900	AT5G46900	AT3G07000	AT5G62280	AT5G46900	AT2G43000	AT5G59530	AT2G36690	AT3G21080	AT3G26830	AT3G21080	AT3G07000	AT3G21080	AT4G29690
	AT5G46900	AT5G49270	AT5G49270	AT5G62280	AT5G25820	AT5G49270	AT3G18250	AT3G21080	AT4G10500	AT4G29690	AT2G35200	AT4G29690	AT5G62280	AT4G29690	AT5G47530
	AT5G49270	AT3G07000	AT3G07000	AT5G25820	AT1G54000	AT3G07000	AT1G02930	AT4G29690	AT5G59530	AT4G22610	AT1G54000	AT4G22610	AT5G25820	AT4G22610	AT5G46900
	AT3G07000	AT5G02350	AT5G02350	AT1G54000	AT5G41590	AT5G02350	AT1G02920	AT5G47530	AT3G21080	AT4G25790	AT1G66270	AT4G25790	AT1G54000	AT3G45840	AT5G49270
	AT5G02350	AT5G62280	AT5G62280	AT2G25260	AT5G24100	AT5G62280	AT2G29460	AT5G54470	AT3G55910	AT4G33720	AT1G66280	AT4G33720	AT2G25260	AT3G26830	AT3G07000
	AT5G62280	AT5G25820	AT5G25820	AT5G17430	AT5G19700	AT1G06120	AT5G62480	AT4G22610	AT3G42800	AT4G33730	AT2G43000	AT4G33730	AT5G17430	AT4G22214	AT3G27490
	AT5G25820	AT1G54000	AT1G54000	AT5G41590	AT4G20460	AT5G41590	AT2G18690	AT3G46090	AT4G29690	AT3G45840	AT4G24340	AT3G45840	AT5G41590	AT5G33355	AT5G02350
	AT1G54000	AT5G41590	AT5G41590	AT2G30130	AT3G29250	AT5G24100		AT4G25790	AT5G47530	AT3G26830	AT3G18250	AT3G26830	AT2G30130	AT3G04220	AT5G62280
	AT2G25260	AT5G24100	AT5G24100	AT5G24100	AT1G05660	AT3G05155		AT4G33720	AT5G54470	AT4G22214	AT5G50760	AT4G22214	AT5G24100	AT1G54000	AT5G25820
	AT5G17430	AT5G19700	AT5G19700	AT5G19700	AT1G14960	AT3G29250		AT4G33730	AT4G22610	AT5G33355	AT3G44550	AT5G33355	AT5G19700	AT1G66270	AT1G54000
	AT5G41590	AT3G05155	AT3G05155	AT4G20460	AT4G25090	AT1G70880		AT3G45840	AT3G46090	AT1G72860	AT1G02930	AT3G04220	AT4G20460	AT2G35980	AT2G25260
	AT2G35980	AT1G79580	AT1G79580	AT3G29250	AT5G56540	AT5G56540		AT3G26830	AT4G25790	AT3G04220	AT1G02920	AT1G54000	AT3G29250	AT1G51790	AT5G17430
	AT2G30130	AT4G20460	AT4G20460	AT1G05660	AT2G27000	AT2G27000		AT4G22214	AT4G33720	AT4G08450	AT2G29460	AT2G35980	AT1G05660	AT1G64590	AT5G41590
	AT5G24100	AT3G29250	AT3G29250	AT2G47540	AT4G22230	AT2G46950		AT5G33355	AT4G33730	AT1G54000	AT5G62480	AT1G51790	AT2G47540	AT3G29250	AT2G35980
	AT5G19700	AT1G05660	AT1G05660	AT1G14960	AT5G25010	AT4G22230		AT4G38410	AT1G29230	AT2G35980	AT1G67920	AT1G64590	AT1G14960	AT1G33960	AT2G30130
	AT3G05155	AT1G14960	AT1G14960	AT4G25090	AT1G75620	AT3G52460		AT1G72860	AT3G45840	AT1G51790	AT5G02090	AT3G29250	AT4G25090	AT1G14880	AT5G24100
	AT1G79580	AT4G25090	AT4G25090	AT5G56540	AT3G52460	AT4G35200		AT3G04220	AT3G26830	AT1G64590	AT1G68320	AT1G33960	AT3G54150	AT4G24340	AT5G19700
	AT2G43000	AT1G64920	AT1G64920	AT2G27000	AT4G35200	AT4G21850		AT4G08450	AT4G02180	AT3G29250	AT4G22680	AT1G14880	AT1G05680	AT3G18250	AT3G05155
	AT4G20460	AT5G56540	AT5G56540	AT4G22230	AT4G21850	AT3G52790		AT1G26380	AT5G62280	AT1G14880	AT3G16390	AT4G24340	AT5G56540	AT5G50760	AT1G79580
	AT3G29250	AT5G57770	AT5G57770	AT5G25010	AT1G68320			AT1G54000	AT4G22214	AT4G24340	AT2G18690	AT3G18250	AT2G27000	AT5G38900	AT2G43000
	AT1G05660	AT5G01490	AT5G01490	AT1G75620	AT3G52790			AT1G66270	AT5G33355	AT1G14960		AT5G50760	AT4G22230	AT1G05680	AT1G25460
	AT2G47540	AT5G24880	AT5G24880	AT3G52460	AT5G14690			AT1G66280	AT4G38410	AT1G70880		AT5G38900	AT5G25010	AT4G31110	AT4G20460
	AT1G14960	AT2G27000	AT2G27000	AT4G35200				AT1G35910	AT1G72860	AT4G17660		AT4G31110	AT5G13990	AT4G17483	AT3G29250
	AT4G25090	AT5G48000	AT5G48000	AT4G21850				AT2G35980	AT3G04220	AT3G18250		AT3G50770	AT1G75620	AT3G50770	AT1G05660
	AT1G64920	AT4G22230	AT4G22230	AT1G68320				AT1G51790	AT4G08450	AT4G15975		AT4G05200	AT3G52460	AT4G05200	AT2G47540
	AT5G56540	AT5G25010	AT5G25010	AT3G52790				AT2G43000	AT5G45220	AT1G61480		AT2G30750	AT4G35200	AT2G30750	AT1G14960
	AT5G57770	AT2G15370	AT2G15370	AT5G14690				AT1G64590	AT1G26380	AT5G50760		AT3G59930	AT4G31875	AT3G59930	AT4G12050
	AT5G01490	AT1G75620	AT1G75620					AT3G29250	AT1G54000	AT5G38900		AT4G22230	AT4G21850	AT4G22230	AT4G22810
	AT5G24880	AT3G52460	AT3G52460					AT4G19030	AT1G66270	AT4G31110		AT4G13235	AT1G68320	AT4G13235	AT4G25090
	AT2G27000	AT4G35200	AT4G35200					AT1G21110	AT1G66280	AT3G50770		AT3G55150	AT3G52790	AT3G55150	AT1G64920
	AT5G48000	AT3G62100	AT3G62100					AT1G14880	AT1G35910	AT4G05200		AT1G01580	AT5G14690	AT1G01580	AT1G05680
	AT2G46950	AT4G21850	AT4G21850					AT2G38390	AT1G36060	AT2G30750		AT1G02930		AT1G02930	AT5G56540
	AT4G22230	AT1G68320	AT1G68320					AT3G03670	AT5G41590	AT3G59930		AT1G02920		AT1G02920	AT5G57770
	AT5G25010	AT3G52790	AT3G52790					AT1G14540	AT2G44000	AT4G22230		AT2G29460		AT2G29460	AT5G01490
	AT2G15370	AT5G14690	AT5G14690					AT4G08770	AT2G35980	AT4G13235		AT1G23040		AT1G23040	AT5G24880
	AT1G75620							AT4G24340	AT1G51790	AT3G55150		AT1G13550		AT1G13550	AT2G27000
	AT3G52460							AT1G14960	AT1G33100	AT1G02930		AT1G67920		AT1G67920	AT5G48000
	AT5G39520							AT1G70880	AT5G19700	AT1G02920		AT3G55970		AT3G62100	AT2G46950
	AT4G35200							AT4G17660	AT2G43000	AT2G29460		AT4G21850		AT3G55970	AT4G22230
	AT3G62100							AT3G18250	AT1G64590	AT1G23040		AT4G39320		AT4G21850	AT5G25010
	AT4G28840							AT4G15975	AT3G29250	AT1G13550		AT3G09940		AT4G39320	AT2G15370
	AT4G21850							AT3G54150	AT4G19030	AT1G67920		AT1G27020		AT3G09940	AT1G75620
	AT1G68320							AT1G61480	AT1G21110	AT3G55970		AT2G18690		AT1G68320	AT3G52460
	AT3G52790							AT5G50760	AT1G33960	AT4G21850		AT5G57550		AT1G19371	AT5G39520
	AT1G01680							AT1G62280	AT1G14880	AT4G39320				AT5G04190	AT4G35200
	AT4G18250							AT5G38900	AT2G38390	AT1G27020				AT1G27020	AT1G67920
	AT2G18690							AT1G57630	AT3G03670	AT3G30720				AT1G70460	AT3G62100
	AT5G14690							AT1G05680	AT1G14540	AT2G18690				AT2G18690	AT4G28840
								AT4G31110	AT4G08770	AT5G57550				AT5G57550	AT4G21850
								AT4G33560	AT4G24340						AT1G68320
								AT1G49960	AT1G14960						AT3G52790
								AT1G04180	AT1G70880						AT1G01680
								AT4G17483	AT4G17660						AT4G18250
								AT3G50770	AT5G66710						AT2G18690
								AT4G05200	AT5G28080						AT5G14690
								AT2G30750	AT3G18250
								AT3G59930	AT4G15975
								AT4G22230	AT3G54150
								AT4G13235	AT1G61480
								AT3G55150	AT4G31320
								AT3G44550	AT5G50760
								AT1G02930	AT4G36110
								AT1G02920	AT1G62280
								AT2G29460	AT5G38900
								AT5G12030	AT1G57630
								AT4G30120	AT1G05680
								AT1G23040	AT4G31110
								AT1G13550	AT4G33560
								AT1G67920	AT1G49960
								AT3G55970	AT1G65730
								AT4G21850	AT1G04180
								AT4G39320	AT4G17483
								AT3G09940	AT5G57770
								AT1G68320	AT4G26560
								AT1G19371	AT5G44460
								AT1G27020	AT3G50770
								AT3G30720	AT5G01490
								AT1G70460	AT4G05200
								AT2G18690	AT4G04490
								AT5G57550	AT2G30750
									AT2G46950
									AT3G59930
									AT4G22230
									AT4G13235
									AT3G55150
									AT3G44550
									AT1G01580
									AT5G11210
									AT1G02930
									AT1G02920
									AT2G29460
									AT5G02780
									AT5G12030
									AT4G30120
									AT1G23040
									AT3G52460
									AT1G13550
									AT5G39520
									AT1G61255
									AT1G67920
									AT4G08555
									AT4G31875
									AT3G62100
									AT3G55970
									AT4G21850
									AT4G39320
									AT3G09940
									AT1G68320
									AT4G05100
									AT1G19371
									AT5G04190
									AT1G01680
									AT1G27020
									AT3G30720
									AT1G77960
									AT1G70460
									AT2G18690
									AT2G35850
									AT4G30290
									AT5G57550
